# Supplementary material for: Nanoencapsulation of Pomegranate Extract to Increase Stability and Potential Dermatological Protection
Source: MDPI journal article supplement (doi:10.3390/pharmaceutics13020271), 2021-02-17
Supplement: s1 [file s1]

# Supplementary Materials: Nanoencapsulation of Pomegranate Extract to Increase Stability and Potential Dermatological Protection

Lucía Yepes-Molina, Jose A. Hernández and Micaela Carvajal

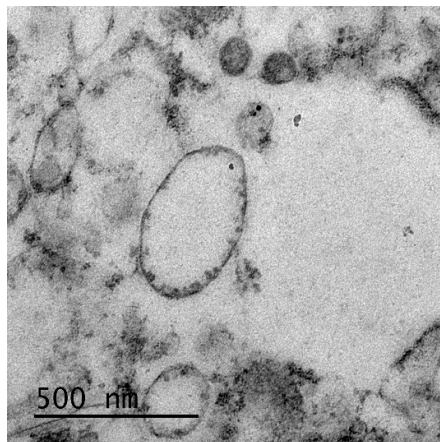

**Figure S1.** Transmission electronic microscopy image of CI-vesicles.

**Table S1.** Antioxidant activity ( $\mu\text{M TE}$ ) of pomegranate extract (PG-E), free or encapsulated in CI-vesicles after released with methanol and chloroform.

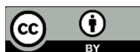

**Copyright:** © 2021 by the authors. Licensee MDPI, Basel, Switzerland.  
This article is an open access article distributed under the terms and  
conditions of the Creative Commons Attribution (CC BY) license  
(<http://creativecommons.org/licenses/by/4.0/>).

**Antioxidant activity ( $\mu\text{M TE}$ )**

|                                                |                      |
|------------------------------------------------|----------------------|
| PG-E, free                                     | 5830.25 $\pm$ 169.00 |
| CI-vesicles with PG-E released with methanol   | 5786.29 $\pm$ 148.00 |
| CI-vesicles with PG-E released with chloroform | 5645.38 $\pm$ 331.45 |

TE: Trolox Equivalents. Data are means  $\pm$  SE ( $n = 3$ ).

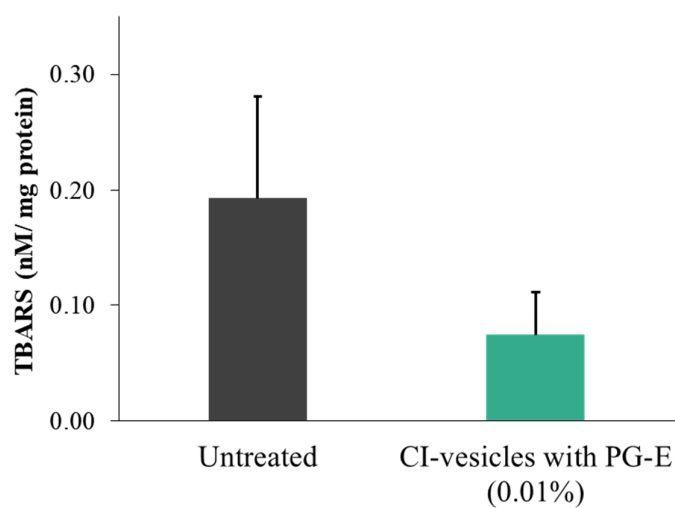

**Figure S2.** TBARS (nM/mg protein) determined in HaCaT cells exposed to UV radiation after treatment for 24 h with cauliflower inflorescence vesicles (CI-vesicles) with pomegranate extract (PG-E) (0.01%). Data are means  $\pm$  SE ( $n = 6$ ).
